# Supplementary material for: Genotypes and Phenotypes of DMD Small Mutations in Chinese Patients With Dystrophinopathies
Source: Front Genet. 2019 Feb 18;10:114. doi: 10.3389/fgene.2019.00114 (PMC6388391; doi:10.3389/fgene.2019.00114)
Supplement: Supplementary file 1 [file Table_1.xlsx]

## Sheet: Supplementary table
Supplementary Table S1. Detailed information of participants
Number	Ethnicity	Age of last review (year)	Phenotype	Age of examination (year)	CK (U/L)	SCRN (μmol/L)	Expression levels of dystrophin C-terminus	Mutation	Predicted changes of protein	Mutation type	Sequencing method	Carrier status of mother	Literature report
1	Han	7	BMD	4	3236	21	Absence	c.-54T>A	-	UTR mutation	Sanger	Y	LOVD
2	Han	4	Pending	2	9830	22	Patchy staining	c.186+2T>C	-	Splicing mutation	Sanger	Y	LOVD
3	Han	4	Pending	3	18760	21	-	c.10329-11_10330delTTTTTTATCAGGC	-	Splicing mutation	NGS	Y	No
4	Han	2	Pending	1	17546	22	-	c.831+1G>T	-	Splicing mutation	Sanger	Y	No
5	Han	17	IMD	16	3653	23	-	c.649+2T>C	-	Splicing mutation	Sanger	Y	LOVD
6	Han	12	IMD	9	12410	19	-	c.8027+1G>A	-	Splicing mutation	Sanger	Y	LOVD
7	-	12	IMD	11	10065	17	Absence	c.3787-1G>T	-	Splicing mutation	NGS	Y	No
8	Han	12	IMD	10	6101	-	Absence	c.2804-1G>T	-	Splicing mutation	Sanger	N	LOVD
9	Han	12	DMD	5	9676	-	-	c.4518+5G>A	-	Splicing mutation	Sanger	Y	LOVD
10	Han	12	DMD	6	9924	-	Absence	c.3604-1G>C	-	Splicing mutation	Sanger	Y	LOVD
11	Han	10	DMD	7	16393	20	-	c.530+2T>C	-	Splicing mutation	Sanger	N	UMD-DMD
12	Han	8	DMD	7	6999	15	-	c.10797+1G>A	-	Splicing mutation	Sanger	Y	LOVD
13	Han	7	DMD	6	25566	20	Absence	c.6438+1G>A	-	Splicing mutation	NGS	N	LOVD
14	Han	7	DMD	7	18418	19	-	c.2804-1G>T	-	Splicing mutation	NGS	Y	LOVD
15	Han	7	DMD	6	20312	16	Absence	c.1813-3C>A	-	Splicing mutation	NGS	Y	ClinVar
16	Han	5	DMD	5	8480	20	-	c.5449-2A>G	-	Splicing mutation	Sanger	Y	No
17	Han	4	DMD	4	28041	5	-	c.3433-2_ 3433-1invAG	-	Splicing mutation	NGS	Y	No
18	-	3	DMD	3	12233	-	-	c.9164-3_9164-1delCAG	-	Splicing mutation	Sanger	Y	LOVD
19	Han	58	BMD	56	1167	73	-	c.5740-1G>A	-	Splicing mutation	Sanger	-	No
20	Han	36	BMD	35	1485	38	Patchy staining	c.4518+3A>T	-	Splicing mutation	Sanger	Y	No
21	Han	27	BMD	25	2892	42	-	c.4845+1G>T	-	Splicing mutation	Sanger	Y	ClinVar
22	-	21	BMD	21	7737	22	-	c.186+2T>C	-	Splicing mutation	Sanger	Y	LOVD
23	Han	14	BMD	12	3718	27	-	c.8391-1G>C	-	Splicing mutation	NGS	N	LOVD
24	Han	8	BMD	7	23243	31	Patchy staining	c.94-1G>T	-	Splicing mutation	NGS	Y	LOVD
25	Han	7	BMD	7	12636	24	-	c.3603+2dupT	-	Splicing mutation	Sanger	Y	PMID:26284620
26	Han	6	BMD	4	31707	27	-	c.7310-1G>T	-	Splicing mutation	NGS	Y	UMD-DMD
27	Han	6	BMD	6	17639	20	-	c.2168+1G>T	-	Splicing mutation	NGS	Y	ClinVar
28	Han	5	BMD	3	7386	-	-	c.5740-1G>A	-	Splicing mutation	Sanger	Y	No
29	Han	5	BMD	4	8892	33	-	c. 5922+5G>C	-	Splicing mutation	NGS	Y	No
30	Han	6	Pending (missing information of disease history)	6	13987	19	-	c.1363C>T	p.Gln455Ter	Nonsense mutation	NGS	Y	LOVD
31	Hui	3	Pending	2	3609	28	-	c.82C>T	p.Gln28Ter	Nonsense mutation	NGS	Y	LOVD
32	Han	3	Pending	3	11627	-	Absence	c.4375C>T	p.Arg1459Ter	Nonsense mutation	Sanger	Y	LOVD
33	Han	2	Pending	2	9425	14	-	c.615T>A	p.Tyr205Ter	Nonsense mutation	Sanger	-	LOVD
34	Han	1	Pending	-	6000-10000	-	-	c.3121C>T	p.Gln1041Ter	Nonsense mutation	NGS	Y	LOVD
35	Han	1	Pending	0.58	8980	18	-	c.2074G>T	p.Glu692Ter	Nonsense mutation	NGS	Y	UMD-DMD
36	Han	1	Pending	1	7839	19	-	c.6007G>T	p.Glu2003Ter	Nonsense mutation	NGS	Y	No
37	Han	20	IMD	15	1778	10	-	c.10141C>T	p.Arg3381Ter	Nonsense mutation	Sanger	-	LOVD
38	Han	21	DMD	-	-	-	Absence	c.9284T>G	p.Leu3095Ter	Nonsense mutation	Sanger	Y	LOVD
39	Han	16	DMD	15	2812	9	-	c.354G>A	p.Trp118Ter	Nonsense mutation	Sanger	Y	LOVD
40	Han	11	DMD	8	9754	11	-	c.1663C>T	p.Gln555Ter	Nonsense mutation	Sanger	N	LOVD
41	Han	11	DMD	11	1855	9	-	c.4996C>T	p.Arg1666Ter	Nonsense mutation	NGS	Y	PMID:11524473
42	Han	10	DMD	8	8986	10	-	c.6292C>T	p.Arg2098Ter	Nonsense mutation	Sanger	Y	LOVD
43	Han	10	DMD	9	15427	22	-	c.4499C>A	p.Ser1500Ter	Nonsense mutation	NGS	N	UMD-DMD
44	-	10	DMD	6	12335	-	-	c.4174C>T	p.Gln1392Ter	Nonsense mutation	Sanger	Y	LOVD
45	Han	10	DMD	7	24815	-	-	c.4414C>T	p.Gln1472Ter	Nonsense mutation	NGS	Y	ClinVar
46	Han	9	DMD	8	20740	13	-	c.5899C>T	p.Arg1967Ter	Nonsense mutation	Sanger	Y	LOVD
47	Han	9	DMD	9	10811	14	-	c.4729C>T	p.Arg1577Ter	Nonsense mutation	Sanger	Y	LOVD
48	Han	9	DMD	7	18173	12	-	c.394C>T	p.Gln132Ter	Nonsense mutation	Sanger	Y	No
49	Han	9	DMD	9	4474	15	-	c.2833C>T	p.Gln945Ter	Nonsense mutation	Sanger	N	LOVD
50	Han	9	DMD	9	13457	21	-	c.2302C>T	p.Arg768Ter	Nonsense mutation	Sanger	Y	LOVD
51	-	9	DMD	9	13000	-	-	c.2213C>G	p.Ser738Ter	Nonsense mutation	NGS	-	PMID:27122458
52	Han	9	DMD	9	21343	14	-	c.1837A>T	p.Lys613Ter	Nonsense mutation	NGS	N	No
53	Han	7	DMD	6	11717	13	Absence	c.9072G>A	p.Trp3024Ter	Nonsense mutation	Sanger	Y	LOVD
54	Han	7	DMD	6	8216	15	-	c.8944C>T	p.Arg2982Ter	Nonsense mutation	NGS	Y	LOVD
55	Han	7	DMD	6	12800	19	-	c.8608C>T	p.Arg2870Ter	Nonsense mutation	NGS	Y	LOVD
56	Han	7	DMD	7	-	17	-	c.829C>T	p.Gln277Ter	Nonsense mutation	Sanger	Y	LOVD
57	Han	7	DMD	7	19146	-	Absence	c.7705C>T	p.Gln2569Ter	Nonsense mutation	Sanger	-	A Chinese degree dissertation (Yang Chao, Central South University, 2014)
58	Han	7	DMD	6	29489	20	Absence	c.6436A>T	p.Lys2146Ter	Nonsense mutation	NGS	Y	LOVD
59	Han	7	DMD	5	17307	18	-	c.583C>T	p.Arg195Ter	Nonsense mutation	NGS	N	LOVD
60	Han	7	DMD	7	11949	16	-	c.2971G>T	T.Glu991Ter	Nonsense mutation	NGS	Y	LOVD
61	Han	7	DMD	6	17919	10	-	c.1201C>T	p.Gln401Ter	Nonsense mutation	Sanger	N	PMID: 27122458
62	Han	7	DMD	5	19682	17	Absence	c.10141C>T	p.Arg3381Ter	Nonsense mutation	Sanger	Y	LOVD
63	Han	6	DMD	6	14496	14	-	c.1339A>T	p.Arg477Ter	Nonsense mutation	Sanger	Y	LOVD
64	Han	5	DMD	4	10704	23	Absence	c.883C>T	p.Arg295Ter	Nonsense mutation	Sanger	Y	LOVD
65	Han	5	DMD	5	11707	14	-	c.6547G>T	p.Glu2183Ter	Nonsense mutation	Sanger	-	No
66	Han	5	DMD	5	2056	19	-	c.6292C>T	p.Arg2098Ter	Nonsense mutation	Sanger	Y	LOVD
67	Han	5	DMD	4	29208	14	-	c.1619G>A	p.Trp540Ter	Nonsense mutation	NGS	Y	LOVD
68	Han	5	DMD	4	8297	12	-	c.1099G>T	p.Glu367Ter	Nonsense mutation	Sanger	N	No
69	Han	5	DMD	2	18115	15	-	c.10141C>T	p.Arg3381Ter	Nonsense mutation	NGS	Y	LOVD
70	Han	5	DMD	0.58	5269	14	-	c.10020C>A	p.Cys3340Ter	Nonsense mutation	NGS	Y	PMID: 24770780
71	Han	5	DMD	5	26199	16	-	c.10141C>T	p.Arg3381Ter	Nonsense mutation	NGS	Y	LOVD
72	Han	4	DMD	3	15971	20	-	c.9522C>A	p.Cys3174Ter	Nonsense mutation	NGS	N	LOVD
73	Han	4	DMD	3	21339	16	-	c.8575G>T	p.Glu2859Ter	Nonsense mutation	NGS	Y	ClinVar
74	Han	3	DMD	3	31090	15	-	c.9337C>T	p.Arg3113Ter	Nonsense mutation	Sanger	N	LOVD
75	Han	3	DMD	2	13046	16	-	c.1177C>T	p.Gln393Ter	Nonsense mutation	Sanger	Y	LOVD
76	Han	27	BMD	-	-	-	-	c.7105G>T	p.Glu2369Ter	Nonsense mutation	Sanger	Y	LOVD
77	Han	26	BMD	26	1765	52	-	c.5287C>T	p.Arg1763Ter	Nonsense mutation	Sanger	-	LOVD
78	-	23	BMD	23	7127	33	-	c.5287C>T	p.Arg1763Ter	Nonsense mutation	Sanger	-	LOVD
79	Han	21	BMD	21	4760	41	Patchy staining	c.5002G>T	p.Glu1668Ter	Nonsense mutation	Sanger	Y	A Chinese paper (DOI: 10.3969/j.issn.1672-6731.2015.06.005)
80	Han	17	BMD	16	2742	46	-	c.5632C>T	p.Gln1878Ter	Nonsense mutation	Sanger	Y	No
81	Han	14	BMD	13	6235	40	Patchy staining	c.3352G>T	p.Glu1118Ter	Nonsense mutation	NGS	Y	LOVD
82	Han	11	BMD	10	3909	40	-	c.5632C>T	p.Gln1878Ter	Nonsense mutation	Sanger	Y	No
83	Han	9	BMD	9	9079	35	-	c.9100C>T	p.Arg3034Ter	Nonsense mutation	NGS	N	LOVD
84	Han	9	BMD	5	10793	19	-	c.6283C>T	p.Arg2095Ter	Nonsense mutation	NGS	Y	LOVD
85	-	9	BMD	9	3524	37	-	c.3295C>T	p.Gln1099Ter	Nonsense mutation	Sanger	-	LOVD
86	Han	8	BMD	7	14121	20	-	c.3982C>T	p.Gln1328Ter	Nonsense mutation	NGS	Y	LOVD
87	Han	7	BMD	6	31656	18	-	c.5868G>A	p.Trp1956Ter	Nonsense mutation	NGS	Y	UMD-DMD
88	Han	7	BMD	5	1743	35	-	c.3940C>T	p.Arg1314Ter	Nonsense mutation	Sanger	Y	LOVD
89	Han	5	BMD	3	12678	20	-	c.3822C>G	p.Tyr1274Ter	Nonsense mutation	NGS	Y	LOVD
90	Han	3	Pending	3	3398	38	-	c.9338G>A	p.Arg3113Gln	Missense mutation	NGS	Y	ClinVar
91	Han	2	Pending	0.33	14082	14	-	c.831G>T	p.Gln277His	Missense mutation	NGS	Y	LOVD
92	Han	8	DMD	7	11951	-	Absence	c.77A>G	p.Asn26Ser	Missense mutation	Sanger	Y	LOVD
93	Han	27	BMD	26	2589	46	Patchy staining	c.500T>C	p.Leu167Pro	Missense mutation	NGS	N	No
94	-	16	BMD	16	6180	38	-	c.9997A>C	p.Asn3333His	Missense mutation	NGS	Y	No
95	Han	5	BMD	3	4343	25	Patchy staining	c.496G>T	p.Gly166Cys	Missense mutation	NGS	N	No
96	Han	4	Pending	5	-	-	-	c.7833dupT	p.Thr2612Tyrfs*31	Frameshift mutation	NGS	-	LOVD
97	Han	3	Pending	3	25450	22	-	c.3703_3704delGC	p.Ala1235Leufs*6	Frameshift mutation	NGS	Y	No
98	-	3	Pending	3	29111	-	-	c.1365_1366delGA	p.Lys456Thrfs*6	Frameshift mutation	Sanger	-	LOVD
99	Han	3	Pending	3	6744	27	-	c.10231dupA	p.Thr3411Asnfs*22	Frameshift mutation	NGS	Y	LOVD
100	Han	2	Pending	2	17331	20	-	c.5903_5904delGA	p.Arg1968Thrfs*11	Frameshift mutation	NGS	-	No
101	Han	1	Pending	0.83	9241	13	-	c.6804_6807delACAA	p.Lys2268Asnfs*2	Frameshift mutation	NGS	Y	LOVD
102	Han	13	IMD	10	20359	22	-	c.282dupT	p.Gly95Trpfs*4	Frameshift mutation	NGS	N	LOVD
103	Han	11	IMD	11	17324	16	-	c.1980delG	p.Ser661Valfs*16	Frameshift mutation	Sanger	-	No
104	Han	9	DMD	9	9032	9	Absence	c.841_844delAGTC	p.Ser281Ter	Frameshift mutation	Sanger	-	No
105	Han	8	DMD	8	4193	8	-	c.6328delC	p.His2110Ilefs*4	Frameshift mutation	NGS	Y	No
106	Han	8	DMD	6	26138	13	Absence	c.4368delG	p.Met1456Ilefs*21	Frameshift mutation	Sanger	Y	No
107	Han	7	DMD	6	11245	14	Absence	c.5602_5605delAGAA	p.Arg1868Glufs*5	Frameshift mutation	NGS	N	LOVD
108	Han	7	DMD	5	10179	19	-	c.1376dupA	p.Leu460Valfs*3	Frameshift mutation	Sanger	-	No
109	-	6	DMD	6	40428	16	-	c.3867_3876delTAAAACCACT	p.Thr1292Phefs*12	Frameshift mutation	Sanger	-	LOVD
110	Han	6	DMD	6	12396	16	-	c.3257delA	p.Lys1086Serfs*3	Frameshift mutation	Sanger	-	LOVD
111	Han	6	DMD	6	10051	19	-	c.1533_1536delTCAC	p.His512Trpfs*4	Frameshift mutation	NGS	N	LOVD
112	Han	6	DMD	6	11396	18	-	c. 3833delC	p.Ala1278Glufs*5	Frameshift mutation	Sanger	Y	No
113	Han	5	DMD	3	22870	11	-	c.4771delG	p.Asp1591Ilefs*4	Frameshift mutation	Sanger	Y	No
114	Han	32	BMD	28	2335	32	Patchy staining	c.10230dupT	p.Thr3411Tyrfs*22	Frameshift mutation	Sanger	Y	No
115	Han	15	BMD	15	5673	29	-	c.65dupC	p.Trp24Metfs*8	Frameshift mutation	NGS	N	No
